# Supplementary material
Source: PubMed Central journal article supplement (PMC7403262)
Supplement: 11606_2020_5695_MOESM1_ESM.pdf [file 11606_2020_5695_MOESM1_ESM.pdf]

## Supplement: Semi-Structured Interview Guide

**Thank you for participating in this project. Our purpose is to explore your experience with gender-based harassment by patients and the strategies you use to deal with it.**

### Personal Experience

- 1) Would you feel comfortable telling me about a time that someone at work, a patient, peer, faculty member made a comment related to your gender?

If they say no use additional prompts such as:

Has anyone made a comment on your physical appearance?

Has anyone made a comment on your clothes?

How did you respond?

How did it make you feel?

Was it awkward? Was it distressing? Did it bother you?

How big a problem was/is this?

Would you consider this event harassment? Why or why not?

If you would not call this even harassment what words would you use to describe the event?

- 2) Tell me about a time someone, a patient, peer, faculty member made a comment related to your physical appearance?

How did you respond?

How did it make you feel?

Was it awkward? Was it distressing? Did it bother you?

How big a problem was/is this?

Would you consider this event harassment? Why or why not?

If you would not call this even harassment what words would you use to describe the event?

- 3) During your career has someone, a patient, peer, faculty member flirted with you?

How did you respond?

How did it make you feel?

Was it awkward? Was it distressing? Did it bother you?
